# Supplementary material for: Botulinum Toxin for Essential Tremor and Hands Tremor in the Neurological Diseases: A Meta-Analysis of Randomized Controlled Trials
Source: MDPI journal article supplement (doi:10.3390/toxins14030203), 2022-03-10
Supplement: s1 [file s1]

# Supplementary Materials: Botulinum Toxin for Essential Tremor and Hands Tremor in the Neurological Diseases: A Meta-Analysis of Randomized Controlled Trials

Yen-Hui Liao, Chien-Tai Hong, and Tsai-Wei Huang

Table S1. Risk-of-bias assessment results.

| Author, (Year)                  | Adequacy of randomization | Deviation from intended intervention | Missing outcome data | Measurement of outcomes | Selection of reported results | Overall risk of bias |
|---------------------------------|---------------------------|--------------------------------------|----------------------|-------------------------|-------------------------------|----------------------|
| Boonstra, et al., 2020 [23]     | Low risk                  | Low risk                             | Low risk             | Low risk                | Low risk                      | Low risk             |
| Brin, et al., 2001 [24]         | Low risk                  | Low risk                             | Low risk             | Low risk                | Low risk                      | Low risk             |
| Jankovic, et al., 1996 [25]     | Low risk                  | Low risk                             | Some concerns        | Low risk                | Low risk                      | Some concerns        |
| Jog, et al., 2020 [26]          | Low risk                  | Low risk                             | Low risk             | Low risk                | Low risk                      | Low risk             |
| Mittal, et al., 2017 [27]       | Low risk                  | Low risk                             | Some concerns        | Low risk                | Low risk                      | Some concerns        |
| Mittal, et al., 2018 [28]       | Low risk                  | Low risk                             | Low risk             | Low risk                | Low risk                      | Low risk             |
| Pahwa, et al., 1996 [29]        | Some concerns             | Low risk                             | Low risk             | Low risk                | Low risk                      | Some concerns        |
| Van Der Walt, et al., 2012 [30] | Low risk                  | Low risk                             | Low risk             | Low risk                | Low risk                      | Low risk             |

a) It is likely that missingness depended on true value b) It is likely that missingness depended on true value  
c) Not mention allocation sequence concealed but not suggest a problem while baseline imbalances.

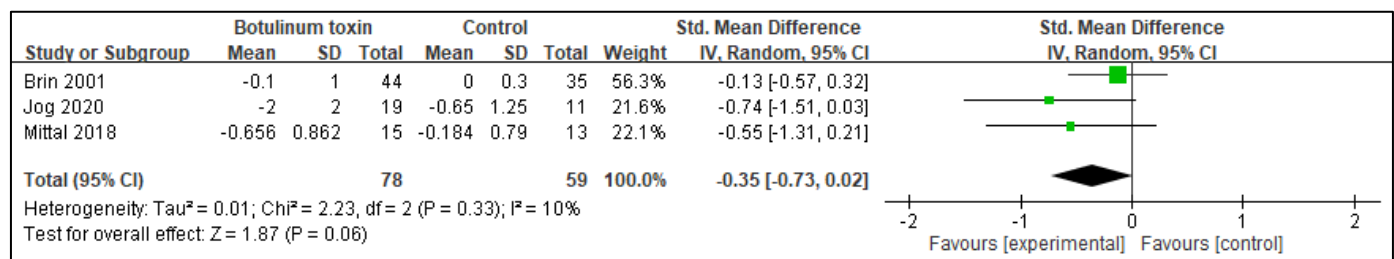

Figure S1. Effect of Botulinum toxin on tremor between 7–12 weeks after treatment in patients with essential tremor.

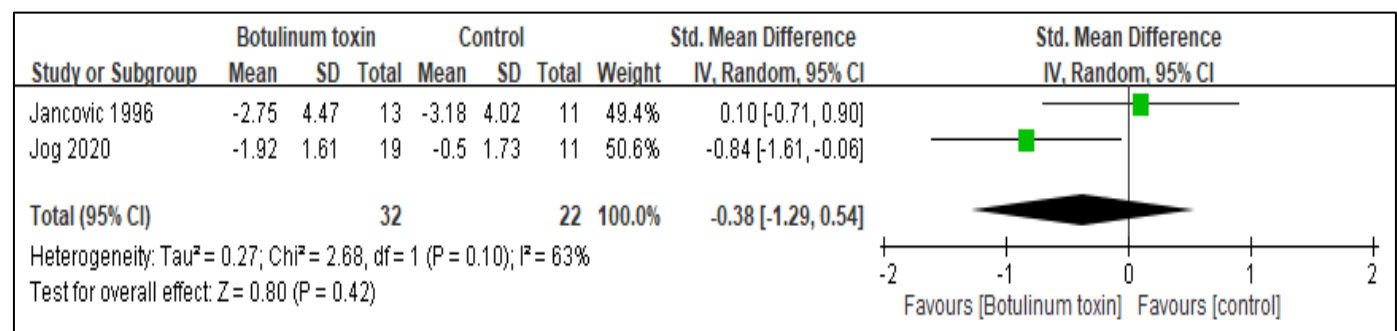

**Figure S2.** Effect of Botulinum toxin on tremor in patients with essential tremor anatomical-guidance.

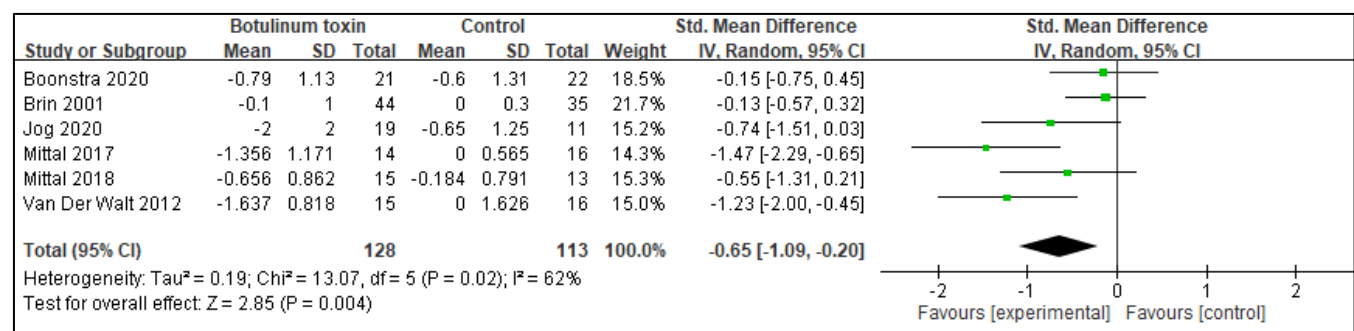

**Figure S3.** Effect of Botulinum toxin on hands tremor between 7–12 weeks.
